# Supplementary material for: Schiff-base polymer derived nitrogen-rich microporous carbon spheres synthesized by molten-salt route for high-performance supercapacitors
Source: Royal Society of Chemistry journal article supplement (doi:10.1039/c5ra07628e), 2015-01-01
Supplement: c5ra07628e1.pdf [file c5ra07628e1.pdf]

## Supporting Information

### Schiff-Base Polymers Derived Nitrogen-Rich Microporous Carbon Spheres Synthesized by Molten-Salt Route for High-Performance Supercapacitors

Shanjin Su, Qingxue Lai, and Yanyu Liang\*

College of Materials Science and Technology, Nanjing University of Aeronautics and Astronautics, 210016 Nanjing, (P.R. China)

\*Corresponding author Tel: +86 25 52112626; Fax: +86 25 52112626.

E-mail address: liangyy403@126.com

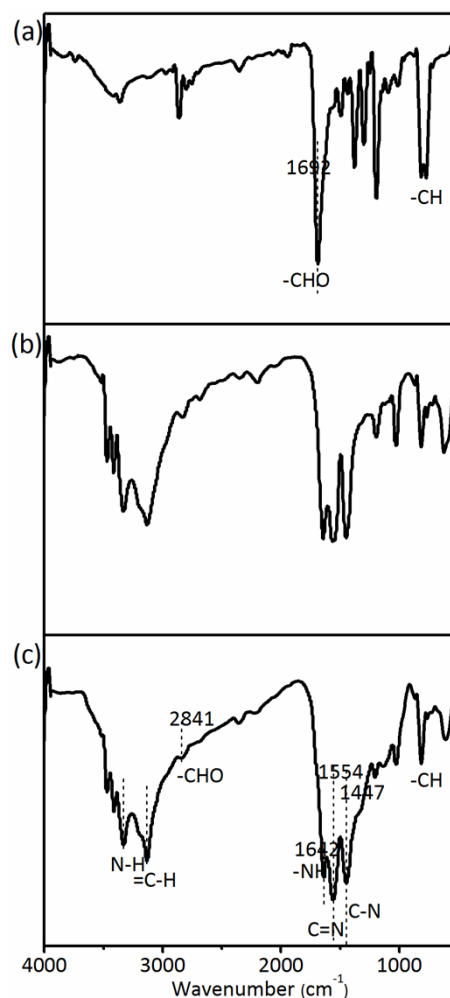

**Figure S1.** FT-IR spectra of (a) terephthalaldehyde; (b) melamine and (c) Schiff-base polymers synthesized at 300 °C. In Figure S1(c), peaks at 1554  $\text{cm}^{-1}$  and 1447  $\text{cm}^{-1}$  indicate the vibration of triazine ring skeleton; no obvious peaks at 1700  $\text{cm}^{-1}$  and 2841  $\text{cm}^{-1}$  indicate the absence of -CHO after polymerization.

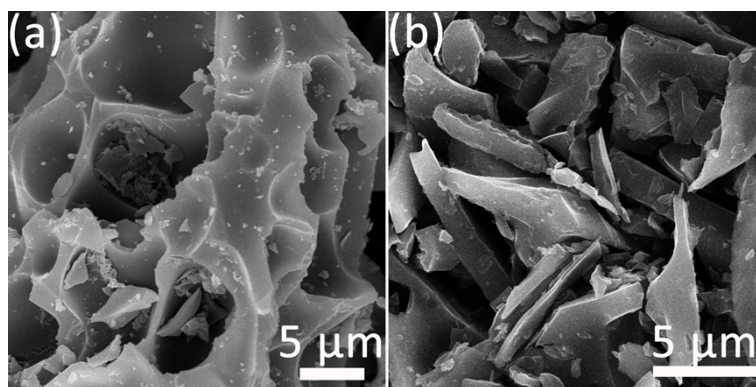

**Figure S2.** SEM images of (a) NPC3-ZK (6, 3) and (b) NPC4-ZK (0, 1).

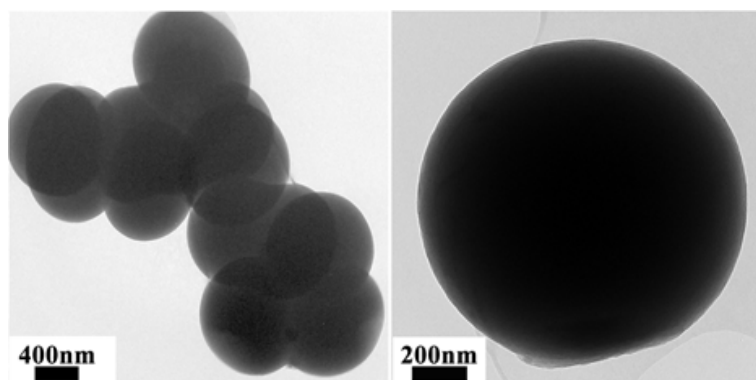

**Figure S3.** TEM images of NMCSs1-ZK (2, 1).

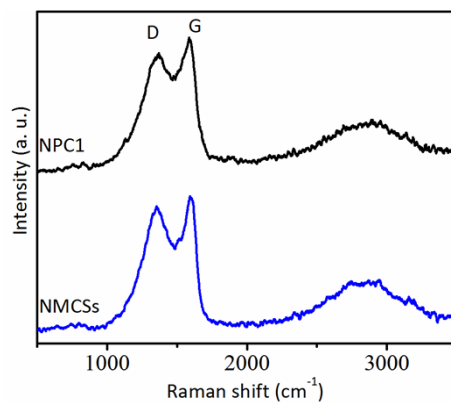

**Figure S4.** Raman spectroscopy of NPC1-ZK (0, 0) and NMCSs-ZK (1, 0.3).

Raman spectroscopy analysis was employed to further investigate the structure of NPC1-ZK (0, 0) and NMCSs-ZK (1, 0.3). As shown in Figure S4, both samples exhibit a broad D band (1364 cm<sup>-1</sup>) and G band (1590 cm<sup>-1</sup>), and the intensity of the G band is obviously higher than that of the D band, indicating that all samples are partially graphitized.
